# Supplementary material
Source: Springer Nature journal article supplement (https://www.springermedizin.de/resource/supplementary/12913_2004_95_MOESM1_ESM.pdf/9534184)
Supplement: MOESM1 [file 9534184]

- Staff safety
- Infection control
- Patient safety
- Medical need
- Surgeon activity
- Operational need
- Compassion
- Screening capability
- Squeaky wheel
- Fear of unknown
- Duty to care
